# Supplementary material for: Comparison Evaluation of the Biological Effects of Sterigmatocystin and Aflatoxin B1 Utilizing SOS-Chromotest and a Novel Zebrafish (Danio rerio) Embryo Microinjection Method
Source: MDPI journal article supplement (doi:10.3390/toxins14040252), 2022-03-31
Supplement: s1 [file s1]

# Supplementary Materials: Comparison Evaluation of the Biological Effects of Sterigmatocystin and Aflatoxin B1 Utilizing SOS-Chromotest and a Novel Zebrafish (*Danio rerio*) Embryo Microinjection Method

Zsolt Csenki<sup>1</sup>, Anita Risa, Dorottya Sárkány, Edina Garai, Ildikó Bata-Vidács, Erzsébet Baka, András Szekeres, Mónika Varga, András Ács, Jeffrey Griffiths, Katalin Bakos, Illés Bock, István Szabó, Balázs Kriszt, Béla Urbányi, József Kukolya

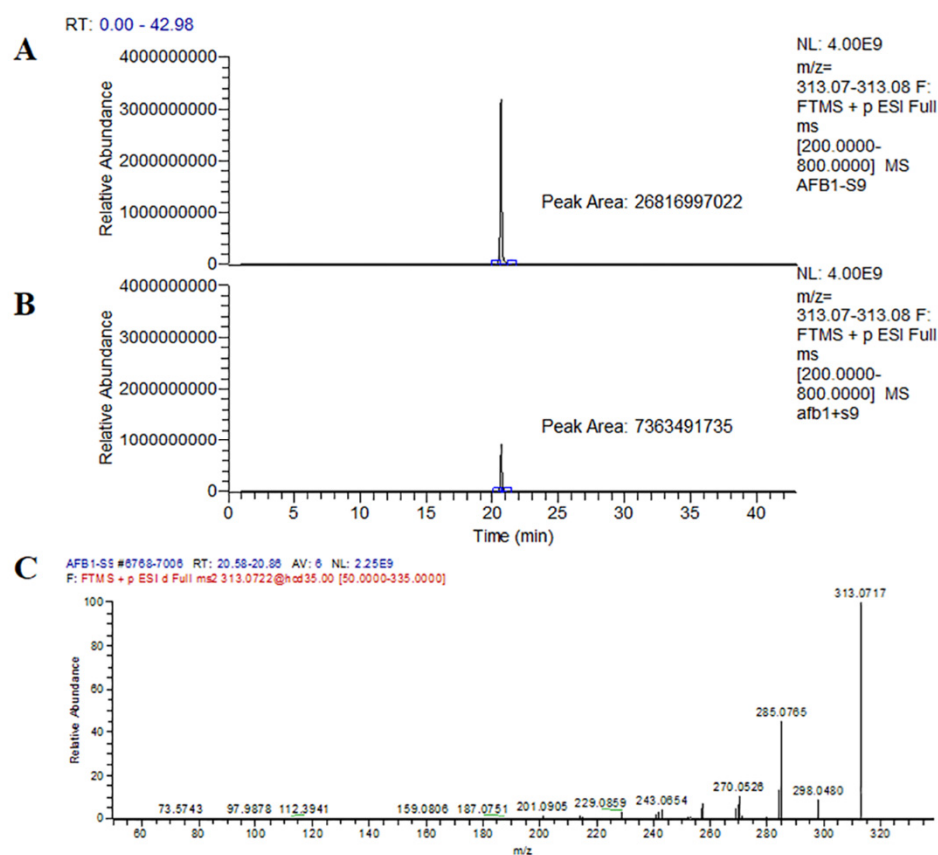

**Figure S1.** Extracted ion chromatogram of AFB1 eluted at  $R_t = 20.7$  min in the AFB1-S9 (A) and FB1+S9 (B) samples as well as the representative MS/MS mass spectrum of AFB1 (C) recorded in the eluted peak.

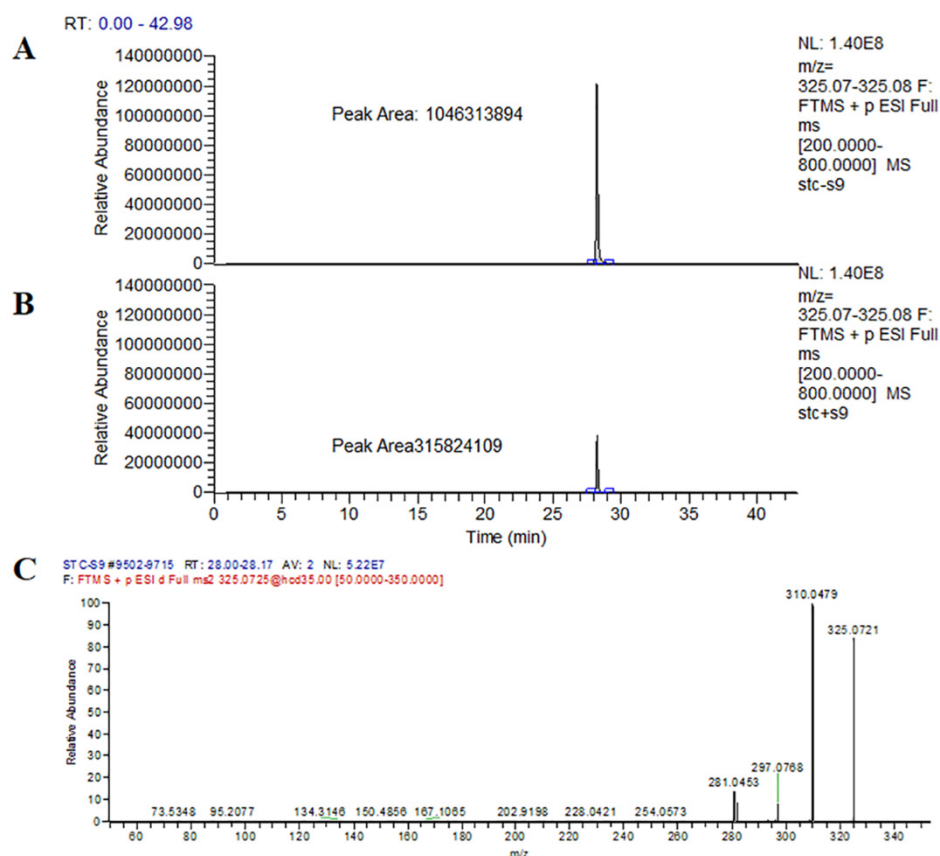

**Figure S2.** Extracted ion chromatogram of STC eluted at  $R_t = 28.2$  min in the STC-S9 (A) and STC+S9 (B) samples as well as the representative MS/MS mass spectrum of STC (C) recorded in the eluted peak.

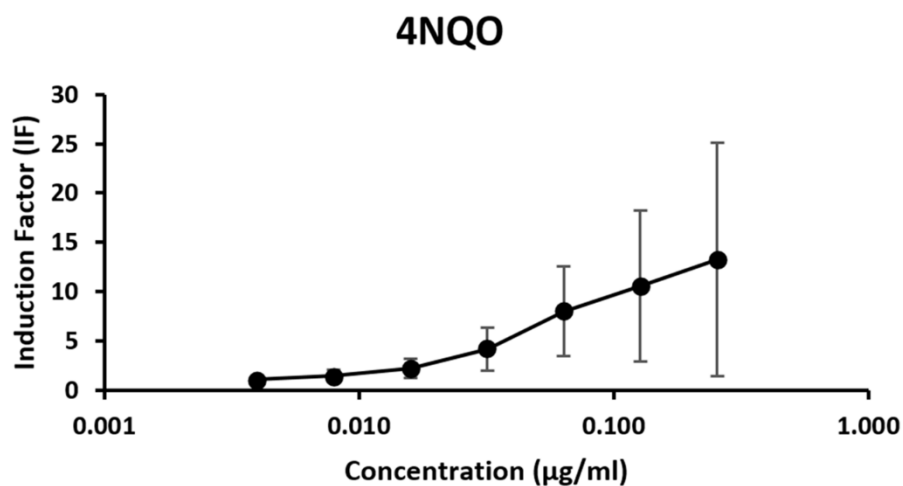

**Figure S3.** Dose-response curves of positive control 4-nitroquinoline-1-oxide (4NQO) used in SOS-Chromo test for determination of the correction factor. (Values represent mean  $\pm$  SD.).

**Table S1.** Effect of normal and metabolically activated (+S9) mycotoxin on survival of the embryos by 120 hours post-treatment. Different letters indicate significant differences ( $p < 0.05$ ). (Values represent mean  $\pm$  SD.).

|          | Mortality (%)                      |                                    |                                    |                                   |
|----------|------------------------------------|------------------------------------|------------------------------------|-----------------------------------|
|          | AFB1                               | AFB1+S9                            | STC                                | STC+S9                            |
| 0.074 nL | 10.00 <sup>a</sup> ( $\pm 8.66$ )  | 5.00 <sup>a</sup> ( $\pm 7.07$ )   | 2.50 <sup>a</sup> ( $\pm 3.54$ )   | 47.50 <sup>b</sup> ( $\pm 3.54$ ) |
| 0.52 nL  | 13.75 <sup>a</sup> ( $\pm 1.77$ )  | 18.61 <sup>a</sup> ( $\pm 7.74$ )  | 5.00 <sup>a</sup> ( $\pm 7.07$ )   | 55.00 <sup>b</sup> ( $\pm 7.07$ ) |
| 1.02 nL  | 17.50 <sup>a</sup> ( $\pm 10.61$ ) | 38.42 <sup>a</sup> ( $\pm 2.23$ )  | 20.88 <sup>a</sup> ( $\pm 12.90$ ) | 70.72 <sup>b</sup> ( $\pm 1.01$ ) |
| 1.77 nL  | 21.67 <sup>a</sup> ( $\pm 18.93$ ) | 40.38 <sup>a</sup> ( $\pm 5.58$ )  | 20.56 <sup>a</sup> ( $\pm 13.36$ ) | 72.50 <sup>b</sup> ( $\pm 3.54$ ) |
| 4.17 nL  | 36.79 <sup>a</sup> ( $\pm 2.53$ )  | 46.67 <sup>a</sup> ( $\pm 12.58$ ) | 28.33 <sup>a</sup> ( $\pm 7.64$ )  | 77.50 <sup>b</sup> ( $\pm 3.54$ ) |

**Table S2.** Effect of normal and metabolically activated (+S9) mycotoxin on the appearance of distorted embryos compared to all surviving embryos by 120 hours post-treatment. Different letters indicate significant differences ( $p < 0.05$ ). (Values represent mean  $\pm$  SD.).

|          | Deformed (%)                       |                                    |                                    |                                    |
|----------|------------------------------------|------------------------------------|------------------------------------|------------------------------------|
|          | AFB1                               | AFB1+S9                            | STC                                | STC+S9                             |
| 0.074 nL | 32.22 ( $\pm 3.06$ )               | 11.00 ( $\pm 15.56$ )              | 17.50 ( $\pm 10.61$ )              | 9.09 ( $\pm 12.86$ )               |
| 0.52 nL  | 29.50 ( $\pm 17.68$ )              | 50.67 ( $\pm 42.74$ )              | 5.50 ( $\pm 7.78$ )                | 58.34 ( $\pm 58.92$ )              |
| 1.02 nL  | 22.00 <sup>a</sup> ( $\pm 15.56$ ) | 100.00 <sup>b</sup> ( $\pm 0.00$ ) | 6.00 <sup>a</sup> ( $\pm 0.00$ )   | 83.34 <sup>b</sup> ( $\pm 23.92$ ) |
| 1.77 nL  | 57.65 <sup>a</sup> ( $\pm 39.07$ ) | 100.00 <sup>b</sup> ( $\pm 0.00$ ) | 22.00 <sup>a</sup> ( $\pm 15.00$ ) | 100.00 <sup>b</sup> ( $\pm 0.00$ ) |
| 4.17 nL  | 100.00 <sup>a</sup> ( $\pm 0.00$ ) | 100.00 <sup>a</sup> ( $\pm 0.00$ ) | 25.33 <sup>b</sup> ( $\pm 1.45$ )  | 100.00 <sup>a</sup> ( $\pm 0.00$ ) |

**Table S3.** Effect of normal and metabolically activated (+S9) mycotoxin on DNA fragmentation compared to 120 hours post-treatment. Different letters indicate significant differences ( $p < 0.05$ ). (Values represent mean  $\pm$  SD.).

|          | DNA double strand break            |                                     |                                     |                                     |
|----------|------------------------------------|-------------------------------------|-------------------------------------|-------------------------------------|
|          | AFB1                               | AFB1+S9                             | STC                                 | STC+S9                              |
| 0.074 nL | 168.94 <sup>a</sup> ( $\pm 1.85$ ) | 184.52 <sup>ab</sup> ( $\pm 3.27$ ) | 144.30 <sup>ab</sup> ( $\pm 1.69$ ) | 181.16 <sup>b</sup> ( $\pm 7.05$ )  |
| 0.52 nL  | 116.23 <sup>a</sup> ( $\pm 0.72$ ) | 167.14 <sup>b</sup> ( $\pm 0.59$ )  | 110.22 <sup>a</sup> ( $\pm 0.58$ )  | 225.04 <sup>c</sup> ( $\pm 2.59$ )  |
| 1.02 nL  | 121.69 <sup>a</sup> ( $\pm 0.47$ ) | 166.46 <sup>b</sup> ( $\pm 4.66$ )  | 124.95 <sup>a</sup> ( $\pm 2.96$ )  | 280.00 <sup>c</sup> ( $\pm 24.95$ ) |
| 1.77 nL  | 180.55 <sup>a</sup> ( $\pm 5.41$ ) | 130.07 <sup>b</sup> ( $\pm 4.85$ )  | 196.23 <sup>a</sup> ( $\pm 2.26$ )  | 285.29 <sup>c</sup> ( $\pm 3.14$ )  |
| 4.17 nL  | 168.06 <sup>a</sup> ( $\pm 7.68$ ) | 154.71 <sup>a</sup> ( $\pm 2.92$ )  | 136.43 <sup>a</sup> ( $\pm 0.66$ )  | 330.64 <sup>b</sup> ( $\pm 16.07$ ) |
